# Supplementary material
Source: PubMed Central journal article supplement (PMC4547589)
Supplement: NIHMS716652-supplement-Supplemental_Tables.pdf [file NIHMS716652-supplement-Supplemental_Tables.pdf]

**Supplemental Table 1.** Case report and small series reporting Polymorphous Low-Grade Adenocarcinomas

| Author               | Publication Year | Presenting Age | Sex | Location                              |
|----------------------|------------------|----------------|-----|---------------------------------------|
| al-Otieschan, A. T.  | 1997             | 50             | F   | glossotonsillar sulcus                |
| Arathi, N.           | 2009             | 25             | M   | parotid                               |
| Arora, S. K.         | 2011             | 18             | M   | palate                                |
| Asioli, S.           | 2006             | 37             | F   | breast                                |
| Asioli, S.           | 2006             | 55             | F   | breast                                |
| Barak, A. P.         | 1998             | 43             | M   | parotid                               |
| Blanchaert, R. H.    | 1998             | 81             | F   | sublingual gland                      |
| Boonsarngsuk, V.     | 2009             | 56             | F   | lung                                  |
| Browne, J. D.        | 2002             | 39             | F   | palate                                |
| Browne, J. D.        | 2002             | 74             | M   | palate                                |
| Charous, D. D.       | 2005             | 84             | M   | maxillary sinus                       |
| Cho, K. D.           | 2007             | 66             | F   | lung                                  |
| Cinamon, U.          | 2000             | 65             | M   | submandibular gland                   |
| Clayton, J. R.       | 1995             | 68             | M   | buccal                                |
| Clayton, J. R.       | 1995             | 70             | M   | lip                                   |
| Cuesta, M.           | 2012             | 63             | F   | palate                                |
| Dardick, I.          | 1988             | 76             | F   | nasopharynx                           |
| de Diego, J. I.      | 1996             | 60             | M   | tongue                                |
| de Magalhaes, M. H.  | 2006             | 40             | F   | mandible                              |
| Dean, A.             | 1994             | 43             | M   | palate                                |
| Dean, A.             | 1994             | 64             | M   | palate                                |
| Fliss, D. M.         | 1989             | 45             | F   | buccal                                |
| Geha, H.             | 2009             | 50             | F   | palate                                |
| Gelincik, I.         | 2010             | 35             | M   | parotid                               |
| Gonzalez-Lagunas, J. | 2005             | 67             | F   | nasal cavity,submandibular ln         |
| Gupta, R.            | 2009             | 47             | F   | tongue                                |
| Gupta, S.            | 2011             | 52             | M   | palate                                |
| Haba, R.             | 1993             | 72             | F   | submandibular gland                   |
| Hannen, E. J.        | 2000             | 60             | F   | palate                                |
| Haring, J. I.        | 1999             | 63             | F   | palate                                |
| Hunter, J. B.        | 2008             | 51             | M   | palate                                |
| Kammerer, P. W.      | 2009             | 78             | F   | palate                                |
| Kennedy, K. S.       | 1987             | 48             | M   | tongue                                |
| Krishnamurthy, A.    | 2011             | 25             | F   | parotid                               |
| Kumar, M.            | 2004             | 16             | F   | palate                                |
| Lee, V. K.           | 2004             | 56             | F   | lung,cervical ln                      |
| Lengyel, E.          | 2000             | 44             | M   | nasopharynx                           |
| Lloreta, J.          | 1995             | 47             | M   | nasopharynx                           |
| Merchant, W. J.      | 1996             | 54             | F   | parotid                               |
| Mincione, G. P.      | 1999             | 67             | M   | palate (submandibular ln,cervical ln) |

Kimble, A. J., *et al.* Supplemental Table 1

| Author              | Publication Year | Presenting Age | Sex | Location                     |
|---------------------|------------------|----------------|-----|------------------------------|
| Minic, A. J.        | 1996             | 16             | M   | palate                       |
| Mitchell, D. A.     | 1989             | 69             | M   | buccal                       |
| Mitchell, D. A.     | 1989             | 62             | F   | buccal                       |
| Mitchell, D. A.     | 1989             | 64             | M   | tongue                       |
| Monaco, S. E.       | 2011             | 65             | F   | palate                       |
| Nagao, T.           | 2004             | 79             | M   | parotid                      |
| Nagao, T.           | 2004             | 51             | F   | submandibular gland          |
| Nagao, T.           | 2004             | 65             | M   | parotid                      |
| Nicolatou, O.       | 1988             | 68             | M   | palate                       |
| O'Rourke, A. K.     | 2006             | 45             | M   | parotid                      |
| Pinto, P. X.        | 1997             | 56             | M   | palate                       |
| Pintor, M. F.       | 2007             | 65             | F   | palate                       |
| Pittman, C. B.      | 2002             | 64             | M   | oropharynx (tonsillar fossa) |
| Potluri, A.         | 2011             | 60             | F   | palate                       |
| Raubenheimer, E. J. | 1990             | 36             | F   | palate                       |
| Ruiz-Godoy, L.      | 2007             | 60             | M   | parotid                      |
| Sato, T.            | 2001             | 58             | F   | palate                       |
| Selva, D.           | 2004             | 67             | M   | lacrimal gland               |
| Simpson, R. H.      | 2002             | 63             | M   | palate                       |
| Simpson, R. H.      | 2002             | 66             | M   | palate                       |
| Tamiolakis, D.      | 2004             | 65             | F   | parotid                      |
| Thomas, K. M.       | 1995             | 58             | F   | floor of mouth               |
| Tincani, A. J.      | 2005             | 69             | M   | tongue                       |
| Tralongo, V.        | 2002             | 68             | F   | buccal                       |
| Tsang, Y. W.        | 1991             | 12             | F   | palate                       |
| Uemaetomari, I.     | 2007             | 52             | F   | parotid                      |
| Uemaetomari, I.     | 2007             | 55             | F   | parotid                      |
| Unal, M.            | 2004             | 67             | M   | tongue                       |
| Wei, Y. C.          | 2008             | 14             | M   | nasopharynx                  |
| Wenig, B. M.        | 1989             | 44             | F   | nasopharynx                  |
| Young, S.           | 2003             | 32             | F   | vagina                       |
| Yu, T.              | 2007             | 24             | M   | sublingual gland             |

lymph node (ln)

**REFERENCES:**

1. Asioli S, Marucci G, Ficarra G *et al.* Polymorphous adenocarcinoma of the breast. Report of three cases. *Virchows Arch* 2006; 448:29-34.
2. Browne JD, Holland BW. Combined intraoral and lateral temporal approach for palatal malignancies with temporalis muscle reconstruction. *Arch Otolaryngol Head Neck Surg* 2002; 128:531-537.
3. Clayton JR, Pogrel MA, Regezi JA. Simultaneous multifocal polymorphous low-grade adenocarcinoma. Report of two cases. *Oral Surg Oral Med Oral Pathol Oral Radiol Endod* 1995; 80:71-77.
4. Dean A, Chaves A, Alamillos F, Del Hoyo JA. Polymorphous low-grade adenocarcinoma of the oral cavity: report of two cases. *J Oral Maxillofac Surg* 1994; 52:627-630.
5. Mitchell DA, Eveson JW, Ord RA. Polymorphous low-grade adenocarcinoma of minor salivary glands--a report of three cases. *Br J Oral Maxillofac Surg* 1989; 27:494-500.
6. Nagao T, Gaffey TA, Kay PA, Minato H, Serizawa H, Lewis JE. Polymorphous low-grade adenocarcinoma of the major salivary glands: report of three cases in an unusual location. *Histopathology* 2004; 44:164-171.
7. Simpson RH, Pereira EM, Ribeiro AC, Abdulkadir A, Reis-Filho JS. Polymorphous low-grade adenocarcinoma of the salivary glands with transformation to high-grade carcinoma. *Histopathology* 2002; 41:250-259.
8. Uemaetomari I, Tabuchi K, Tobita T *et al.* The importance of postoperative radiotherapy against polymorphous low-grade adenocarcinoma of the parotid gland: case report and review of the literature. *Tohoku J Exp Med* 2007; 211:297-302.
9. al-Otieschan AT, Gangopadhyay K. Polymorphous low-grade adenocarcinoma (PLGA) of the tongue. *J Laryngol Otol* 1997; 111:198.
10. Arathi N, Bage AM. Polymorphous low-grade adenocarcinoma of parotid gland: a rare occurrence. *Indian J Pathol Microbiol* 2009; 52:103-105.
11. Arora SK, Sreedharanunni S, Dey P. Cytomorphological features of an aggressive variant of polymorphous low-grade adenocarcinoma in adolescence with lymph node metastasis. *Diagn Cytopathol* 2011.
12. Barak AP, Grobbel MA, Rabaja DR. Polymorphous low-grade adenocarcinoma of the parotid gland. *Am J Otolaryngol* 1998; 19:322-324.
13. Blanchaert RH, Ord RA, Kumar D. Polymorphous low-grade adenocarcinoma of the sublingual gland. *Int J Oral Maxillofac Surg* 1998; 27:115-117.
14. Boonsarngsuk V, Suwatanapongched T, Rochanawutanon M, Ngodngamthaweesuk M, Prakardvudhisarn P. Primary polymorphous low-grade adenocarcinoma of the bronchus: complete tumor removal with bronchoscopic resection. *Lung Cancer* 2009; 63:301-304.
15. Charous DD, Cunnane MF, Rosen MR, Keane WM. Recurrent polymorphous low-grade adenocarcinoma manifesting as a sinonasal mass: a case report. *Ear Nose Throat J* 2005; 84:354, 356-357.
16. Cho KD, Jung JH, Cho D *et al.* Primary polymorphous low-grade adenocarcinoma of lung treated by sleeve bronchial resection: a case report. *J Korean Med Sci* 2007; 22:373-376.
17. Cinamon U, Maly B, Elidan J. Polymorphous low-grade adenocarcinoma of the submandibular gland. *Otolaryngol Head Neck Surg* 2000; 123:337-338.
18. Cuesta M, Bucci T, Gonzalez Lopez LM, Duarte Ruiz B, Riba Garcia F. Polymorphous low-grade adenocarcinoma of the maxilla: pathological findings and reconstructive considerations. *Minerva Stomatol* 2012; 61:37-43.

Kimple, A. J., *et al.* Supplemental Table 1

19. Dardick I, van Nostrand AW. Polymorphous low-grade adenocarcinoma: a case report with ultrastructural findings. *Oral Surg Oral Med Oral Pathol* 1988; 66:459-465.
20. de Diego JI, Bernaldez R, Prim MP, Hardisson D. Polymorphous low-grade adenocarcinoma of the tongue. *J Laryngol Otol* 1996; 110:700-703.
21. de Magalhaes MH, de Magalhaes RP, de Araujo VC, de Sousa SO. Polymorphous low grade adenocarcinoma presenting an uncommon radiographic aspect. *Dentomaxillofac Radiol* 2006; 35:209-212.
22. Fliss DM, Zirkin H, Puterman M, Tovi F. Low-grade papillary adenocarcinoma of buccal mucosa salivary gland origin. *Head Neck* 1989; 11:237-241.
23. Geha H, Francois A, Boland F, Drikes S, Peron J. Polymorphous low-grade adenocarcinoma: a review regarding an unusual presentation as infected odontogenic cyst. *J Plast Reconstr Aesthet Surg* 2009; 62:742-746.
24. Gelincik I, Bayram I, Cankaya H. Polymorphous low-grade adenocarcinoma of left parotid gland. *Indian J Pathol Microbiol* 2010; 53:166-167.
25. Gonzalez-Lagunas J, Alasa-Caparrros C, Vendrell-Escofet G, Huguet-Redecilla P, Raspall-Martin G. Polymorphous low-grade adenocarcinoma of the nasal fossa. *Med Oral Patol Oral Cir Bucal* 2005; 10:367-370.
26. Gupta R, Gupta K. Polymorphous low-grade adenocarcinoma of the tongue: a case report. *J Med Case Rep* 2009; 3:9313.
27. Gupta S, Kumar CA, Raghav N. Polymorphous low-grade adenocarcinoma of the palate: report of a case. *Indian J Cancer* 2011; 48:518-519.
28. Haba R, Kobayashi S, Miki Het al. Polymorphous low-grade adenocarcinoma of submandibular gland origin. *Acta Pathol Jpn* 1993; 43:774-778.
29. Hannen EJ, Bulten J, Festen J, Wienk SM, de Wilde PC. Polymorphous low grade adenocarcinoma with distant metastases and deletions on chromosome 6q23-qter and 11q23-qter: a case report. *J Clin Pathol* 2000; 53:942-945.
30. Haring JI. Case study. Polymorphous low-grade adenocarcinoma. *RDH* 1999; 19:16, 62.
31. Hunter JB, Smith RV, Brandwein-Gensler M. Low-grade papillary adenocarcinoma of the palate: the significance of distinguishing it from polymorphous low-grade adenocarcinoma. *Head Neck Pathol* 2008; 2:316-323.
32. Kammerer PW, Kreft A, Toyoshima T, Al-Nawas B, Klein MO. Misleading initial histological diagnosis of a polymorphous low-grade adenocarcinoma in situ ex pleomorphic adenoma--a case report. *Oral Maxillofac Surg* 2009; 13:99-103.
33. Kennedy KS, Healy KM, Taylor RE, Strom CG. Polymorphous low-grade adenocarcinoma of the tongue. *Laryngoscope* 1987; 97:533-536.
34. Krishnamurthy A, Vaidhyanathan A, Majhi U. Polymorphous low-grade adenocarcinoma of the parotid gland. *J Cancer Res Ther* 2011; 7:84-87.
35. Kumar M, Stivaros N, Barrett AW, Thomas GJ, Bounds G, Newman L. Polymorphous low-grade adenocarcinoma--a rare and aggressive entity in adolescence. *Br J Oral Maxillofac Surg* 2004; 42:195-199.
36. Lee VK, McCaughan BC, Scolyer RA. Polymorphous low-grade adenocarcinoma in the lung: a case report. *Int J Surg Pathol* 2004; 12:287-292.
37. Lengyel E, Somogyi A, Godeny M, Szerdahelyi A, Nemeth G. Polymorphous low-grade adenocarcinoma of the nasopharynx. Case report and review of the literature. *Strahlenther Onkol* 2000; 176:40-42.
38. Lloreta J, Serrano S, Corominas JM, Ferres-Padro E. Polymorphous low-grade adenocarcinoma arising in the nasal cavities with an associated undifferentiated carcinoma. *Ultrastruct Pathol* 1995; 19:365-370.

Kimple, A. J., *et al.* Supplemental Table 1

39. Merchant WJ, Cook MG, Eveson JW. Polymorphous low-grade adenocarcinoma of parotid gland. *Br J Oral Maxillofac Surg* 1996; 34:328-330.
40. Mincione GP, Nesi G, Amorosi A. Polymorphous low-grade adenocarcinoma of the soft palate: fine needle aspiration (FNA) cytology. *Cytopathology* 1999; 10:61-65.
41. Minic AJ. Polymorphous low-grade adenocarcinoma of the palate in a 16-year-old male patient. *Br J Oral Maxillofac Surg* 1996; 34:540-541.
42. Monaco SE, Khalbuss WE, Ustinova E, Liang A, Cai G. The cytomorphic spectrum of salivary gland type tumors in the lung and mediastinum: A report of 16 patients. *Diagn Cytopathol* 2011.
43. Nicolatou O, Kakarantza-Angelopoulou E, Angelopoulos AP, Anagnostopoulou S. Polymorphous low-grade adenocarcinoma of the palate: report of a case with electron microscopy. *J Oral Maxillofac Surg* 1988; 46:1008-1013.
44. O'Rourke AK, Gourin CG, Wade ZK, Hessler RB. Polymorphous low-grade adenocarcinoma of the parotid gland. *Ear Nose Throat J* 2006; 85:669-671.
45. Pinto PX, Coleman N. Regional metastasis in polymorphous low grade adenocarcinoma. Report of a case. *Int J Oral Maxillofac Surg* 1997; 26:447-449.
46. Pintor MF, Figueroa L, Martinez B. Polymorphous low grade adenocarcinoma: review and case report. *Med Oral Patol Oral Cir Bucal* 2007; 12:E549-551.
47. Pittman CB, Zitsch RP, 3rd. Polymorphous low-grade adenocarcinoma of the tonsil: report of a case and review of the literature. *Am J Otolaryngol* 2002; 23:297-299.
48. Potluri A, Prasad J, Levine S, Bastaki J. Polymorphous low grade adenocarcinoma: a case report. *Dentomaxillofac Radiol* 2011.
49. Raubenheimer EJ, van Heerden WF, Thein T. Tyrosine-rich crystalloids in a polymorphous low-grade adenocarcinoma. *Oral Surg Oral Med Oral Pathol* 1990; 70:480-482.
50. Ruiz-Godoy L, Suarez L, Mosqueda A, Meneses A. Polymorphous low-grade adenocarcinoma of the parotid gland. Case report and review of the literature. *Med Oral Patol Oral Cir Bucal* 2007; 12:E30-33.
51. Sato T, Indo H, Takasaki T, Kawabata Y, Morita Y, Noikura T. A rare case of intraosseous polymorphous low-grade adenocarcinoma (PLGA) of the maxilla. *Dentomaxillofac Radiol* 2001; 30:184-187.
52. Selva D, Davis GJ, Dodd T, Rootman J. Polymorphous low-grade adenocarcinoma of the lacrimal gland. *Arch Ophthalmol* 2004; 122:915-917.
53. Tamiolakis D, Thomaidis V, Tsamis *et al.* Polymorphous low grade adenocarcinoma of the parotid gland. Cytological, histological and immunohistochemical features and review of the literature. *Acta Medica (Hradec Kralove)* 2004; 47:3-6.
54. Thomas KM, Cumberworth VL, McEwan J. Orbital and skin metastases in a polymorphous low grade adenocarcinoma of the salivary gland. *J Laryngol Otol* 1995; 109:1222-1225.
55. Tincani AJ, Altemani A, Martins A *et al.* Polymorphous low-grade adenocarcinoma at the base of the tongue: an unusual location. *Ear Nose Throat J* 2005; 84:794-795, 799.
56. Tralongo V, Becchina G, Genovese F, Nagar C, Ottovoggio G, Pinto G. Polymorphous low-grade adenocarcinoma of the salivary glands: clinicopathological and immunohistochemical study of a case. *Anticancer Res* 2002; 22:1347-1352.
57. Tsang YW, Tung Y, Chan JK. Polymorphous low grade adenocarcinoma of the palate in a child. *J Laryngol Otol* 1991; 105:309-311.
58. Unal M, Polat A, Akbas Y, Pata Y. Polymorphous low-grade adenocarcinoma of the tongue. *Auris Nasus Larynx* 2004; 31:85-88.

Kimble, A. J., *et al.* Supplemental Table 1

59. Wei YC, Huang CC, Chien CY, Hwang JC, Chen WJ. Polymorphous low-grade adenocarcinoma of the nasopharynx: a case report and brief review. *J Clin Pathol* 2008; 61:1124-1126.
60. Wenig BM, Harpaz N, DelBridge C. Polymorphous low-grade adenocarcinoma of seromucous glands of the nasopharynx. A report of a case and a discussion of the morphologic and immunohistochemical features. *Am J Clin Pathol* 1989; 92:104-109.
61. Young S, Leon M, Talerman A, Teresi M, Emmadi R. Polymorphous low-grade adenocarcinoma of the vulva and vagina: a tumor resembling adenoid cystic carcinoma. *Int J Surg Pathol* 2003; 11:43-49.
62. Yu T, Gao QH, Wang XY, Wen YM, Li LJ. Malignant sublingual gland tumors: a retrospective clinicopathologic study of 28 cases. *Oncology* 2007; 72:39-44.

**Supplemental Table 2.** Location of presenting tumors in case series (n ≤ 3) and case reports (n = 1)

| Location            | Cases |     |
|---------------------|-------|-----|
|                     | (#)   | (%) |
| palate              | 25    | 35  |
| parotid             | 12    | 17  |
| tongue              | 6     | 8   |
| nasopharynx         | 5     | 7   |
| buccal mucosa       | 5     | 7   |
| submandibular gland | 3     | 4   |
| lung                | 3     | 4   |
| sublingual gland    | 2     | 3   |
| oropharynx          | 2     | 3   |
| breast              | 2     | 3   |
| lip                 | 1     | 1   |
| vagina              | 1     | 1   |
| nasal cavity        | 1     | 1   |
| mandible            | 1     | 1   |
| lacrimal gland      | 1     | 1   |
| floor of mouth      | 1     | 1   |
| maxillary sinus     | 1     | 1   |

**Supplemental Table 3** - Seventeen series (n > 3) were identified that included 384 patients diagnosed with PLGA.

| Author                 | Year | Population (#) | Recurrences (#) | Recurrences (%) | Average Time to Recurrence (mo) | Range (mo)     |
|------------------------|------|----------------|-----------------|-----------------|---------------------------------|----------------|
| Aberle, A. M.          | 1985 | 17             | 4               | 23.5            | nr                              | 5 - 120        |
| Abu El-Naaj, I.        | 2011 | 4              | 1               | 25.0            | 72                              | 72 - 72        |
| Beltran, D.            | 2006 | 15             | 3               | 20.0            | 51                              | 9 - 84         |
| Castle, J. T.          | 1999 | 164            | 17              | 10.4            | 94.4                            | 24 - 168       |
| Colmenero, C. M.       | 1992 | 13             | 3               | 23.1            | 32                              | 12 - 60        |
| Crean, S. J.           | 1996 | 4              | 0               | 0.0             | na                              | na             |
| Evans, H. L.           | 2000 | 40             | 13              | 32.5            | 90                              | 12 - 288       |
| Evans, H. L.           | 1984 | 14             | 3               | 21.4            | 24                              | 12 - 36        |
| Gnepp, D. R.           | 1988 | 4              | 0               | 0.0             | na                              | na             |
| Gonzalez-Garcia, R.    | 2005 | 6              | 2               | 33.3            | 48                              | 12 - 84        |
| Moore, B. A.           | 2008 | 10             | 0               | 0.0             | na                              | na             |
| Perez-Ordonez, B.      | 1998 | 17             | 3               | 17.6            | 128                             | 72 - 168       |
| Pogodzinski, M. S.     | 2006 | 19             | 5               | 26.3            | 93.6                            | 36 - 180       |
| Schwarz, S.            | 2011 | 8              | 2               | 25.0            | nr                              | nr             |
| Seethala, R. R.        | 2010 | 24             | 8               | 33.3            | nr                              | nr             |
| Slootweg, P. J.        | 1987 | 15             | 5               | 33.3            | 114                             | 12 - 216       |
| Vincent, S. D.         | 1994 | 10             | 1               | 10.0            | 24                              | 24 - 24        |
| <b>Subtotal</b>        |      | <b>384</b>     | <b>70</b>       | <b>18.2</b>     | <b>70.1</b>                     | <b>5 - 288</b> |
|                        |      |                |                 |                 |                                 |                |
| <b>Cohort of Cases</b> |      | <b>72</b>      | <b>17</b>       | <b>23.6</b>     | <b>61</b>                       | <b>6 - 216</b> |
|                        |      |                |                 |                 |                                 |                |
| <b>Total</b>           |      | <b>456</b>     | <b>87</b>       | <b>19.1</b>     | <b>65.5</b>                     | <b>5 - 288</b> |



**REFERENCES:**

1. Aberle AM, Abrams AM, Bowe R, Melrose RJ, Handlers JP. Lobular (polymorphous low-grade) carcinoma of minor salivary glands. A clinicopathologic study of twenty cases. *Oral Surg Oral Med Oral Pathol* 1985; 60:387-395.
2. Castle JT, Thompson LD, Frommelt RA, Wenig BM, Kessler HP. Polymorphous low grade adenocarcinoma: a clinicopathologic study of 164 cases. *Cancer* 1999; 86:207-219.
3. Evans HL, Luna MA. Polymorphous low-grade adenocarcinoma: a study of 40 cases with long-term follow up and an evaluation of the importance of papillary areas. *Am J Surg Pathol* 2000; 24:1319-1328.
4. Moore BA, Burkey BB, Nettekville JL, Butcher RB, 2nd, Amedee RG. Surgical management of minor salivary gland neoplasms of the palate. *Ochsner J* 2008; 8:172-180.
5. Perez-Ordóñez B, Linkov I, Huvos AG. Polymorphous low-grade adenocarcinoma of minor salivary glands: a study of 17 cases with emphasis on cell differentiation. *Histopathology* 1998; 32:521-529.
6. Pogodzinski MS, Sabri AN, Lewis JE, Olsen KD. Retrospective study and review of polymorphous low-grade adenocarcinoma. *Laryngoscope* 2006; 116:2145-2149.
7. Schwarz S, Muller M, Ettl T, Stockmann P, Zenk J, Agaimy A. Morphological heterogeneity of oral salivary gland carcinomas: a clinicopathologic study of 41 cases with long term follow-up emphasizing the overlapping spectrum of adenoid cystic carcinoma and polymorphous low-grade adenocarcinoma. *Int J Clin Exp Pathol* 2011; 4:336-348.
8. Seethala RR, Johnson JT, Barnes EL, Myers EN. Polymorphous low-grade adenocarcinoma: the University of Pittsburgh experience. *Arch Otolaryngol Head Neck Surg* 2010; 136:385-392.
9. Abu El-Naaj I, Leiser Y, Wolff A, Peled M. Polymorphous low grade adenocarcinoma: case series and review of surgical management. *J Oral Maxillofac Surg* 2011; 69:1967-1972.
10. Beltran D, Faquin WC, Gallagher G, August M. Selective immunohistochemical comparison of polymorphous low-grade adenocarcinoma and adenoid cystic carcinoma. *J Oral Maxillofac Surg* 2006; 64:415-423.
11. Colmenero CM, Patron M, Burgueno M, Sierra I. Polymorphous low-grade adenocarcinoma of the oral cavity: a report of 14 cases. *J Oral Maxillofac Surg* 1992; 50:595-600.
12. Crean SJ, Bryant C, Bennett J, Harris M. Four cases of polymorphous low-grade adenocarcinoma. *Int J Oral Maxillofac Surg* 1996; 25:40-44.
13. Evans HL, Batsakis JG. Polymorphous low-grade adenocarcinoma of minor salivary glands. A study of 14 cases of a distinctive neoplasm. *Cancer* 1984; 53:935-942.
14. Gnepp DR, Chen JC, Warren C. Polymorphous low-grade adenocarcinoma of minor salivary gland. An immunohistochemical and clinicopathologic study. *Am J Surg Pathol* 1988; 12:461-468.
15. Gonzalez-Garcia R, Rodriguez-Campo FJ, Munoz-Guerra MF, Nam-Cha SH, Sastre-Perez J, Naval-Gias L. Polymorphous low-grade adenocarcinoma of the palate: report of cases. *Auris Nasus Larynx* 2005; 32:275-280.
16. Slootweg PJ, Muller H. Low-grade adenocarcinoma of the oral cavity. A comparison between the terminal duct and the papillary type. *J Craniomaxillofac Surg* 1987; 15:359-364.

Kimble, A.J. *et al.* Supplemental Table 3

17. Vincent SD, Hammond HL, Finkelstein MW. Clinical and therapeutic features of polymorphous low-grade adenocarcinoma. *Oral Surg Oral Med Oral Pathol* 1994; 77:41-47.
